# Supplementary material for: Dating early animal evolution using phylogenomic data
Source: PubMed Central journal article supplement (PMC5472626; doi:10.1038/s41598-017-03791-w), 2017-06-15
Supplement: 41598_2017_3791_MOESM1_ESM.pdf [file 41598_2017_3791_MOESM1_ESM.pdf]

## SUPPLEMENTARY INFORMATION

### Dating early animal evolution using phylogenomic data

Martin Dohrmann and Gert Wörheide

### SUPPLEMENTARY METHODS

#### Details of molecular clock analyses

We used the phylogenomic dataset and the corresponding tree topology (Supplementary Fig. S3) of Philippe et al. <sup>1</sup> as the basis for our divergence-time analyses. We chose this dataset because it was designed to optimize taxon sampling of non-bilaterian animals in order to decipher the phylogeny of the five major animal lineages (Porifera, Placozoa, Ctenophora, Cnidaria, and Bilateria) and was the largest phylogenomic dataset of this kind available when we started to run our analyses. The alignment consists of 30,257 amino acid (aa) positions from 44 metazoan plus 11 non-metazoan opisthokont taxa (see Philippe et al. <sup>1</sup> for details of data acquisition and curation).

Because it has been suggested that ctenophores might not be the sister group of Cnidaria, as in Philippe et al. <sup>1</sup>, but sister to Placozoa + Cnidaria + Bilateria <sup>2</sup> or sister to all other animals <sup>3</sup>, we also conducted analyses with the tree topology fixed to these alternative arrangements (using TreeEdit <sup>4</sup>) to evaluate the impact of these different tree topologies on divergence time estimation. The analyses with alternative placements of Ctenophora were conducted under the autocorrelated clock model, 1000 Ma root age prior, and *Calibration set A* (see below).

To calibrate the tree (see below for detailed descriptions of the calibration schemes), we initially assembled a set of fossil calibrations from the literature, aiming at maximizing the number of calibrated nodes with a fair distribution across Metazoa, hereafter *Calibration set A*. Because some of the calibrations in *Calibration set A* might be debatable, especially regarding the sponge fossil record, we also assembled a second, more conservative calibration set, *Calibration set B*. Since *Calibration sets A* and *B* contain several maximum constraints for bilaterian nodes (adopted from Rota-Stabelli et al. <sup>5</sup>; see that paper for justification), which might have imposed a strong bias and potentially mislead results, we also conducted an analysis using a modified *Calibration set A* with these constraints removed. This analysis also recovered the general pattern recovered with the other analyses (see Results). However,

overall age estimates for the deepest nodes were roughly 200 myrs older (see output files available at <https://doi.org/10.6084/m9.figshare.3472943>), which is in our opinion unrealistically ancient. Thus, we did not consider this calibration set further. Finally, we tried to adopt the calibration scheme of Erwin et al. <sup>6</sup> as closely as possible, giving *Calibration set C*.

To assess the sensitivity of the clade age estimates to prior assumptions about the age of the root (i.e., the age of crown-group Opisthokonta), we conducted analyses under three different root age priors (using *Calibration set A*): 1)  $1000 \pm 100$  Ma, adopted from Erwin et al. <sup>6</sup> (see their paper for justification); 2) a somewhat arbitrarily chosen much younger age of  $800 \pm 100$  Ma, which is more in line with interpretations of, e.g., Cavalier-Smith <sup>7</sup>; and 3)  $1360 \pm 100$  Ma, based on molecular-clock estimates for the age of crown-group Opisthokonta <sup>8</sup>. For comparison, we also conducted an analysis using a wider standard deviation (1000 myr), which resulted in only marginally different mean estimates and CrIs (see output files available at <https://doi.org/10.6084/m9.figshare.3472943>).

To evaluate the relative influence of the calibration priors and the data on the estimated divergence times, we also conducted analyses without data, i.e., sampling only from the prior distributions (using an autocorrelated relaxed-clock model and the 1000 Ma root age prior). For all three calibration sets, the prior mean divergence times and CrIs of the vast majority of internal nodes substantially differed from the posterior estimates (see "prior\_comp.txt" files available at <https://doi.org/10.6084/m9.figshare.3472943>). The only notable exceptions were node 82 (Ambulacraria) in *A* and *B*, node 78 (Chordata) in *B*, and node 69 in *C* (Bivalvia/Gastropoda), all of which are calibrated nodes that are not relevant to our general conclusions. Thus, the calibration sets appeared suitable, allowing the data to dominate the results.

All analyses were performed with PhyloBayes v. 3.3.f <sup>9</sup>, because it is the only software that implements the CAT substitution model <sup>10</sup>, which was shown to be the best fit for this dataset <sup>1</sup>. We conducted most of the analyses under the lognormal autocorrelated relaxed-clock model (ln), following Lepage et al. <sup>11</sup>. However, because it has been argued that autocorrelated models might not generally provide a good fit to empirical datasets <sup>12,13</sup>, we also ran an analysis with *Calibration set A* and the 1000 Ma root age prior under the uncorrelated gamma model (ugam). We further conducted a rough investigation into relative fit of these alternative models to the data, by calculating AICM values <sup>14,15</sup> from the post-burnin likelihood traces using Tracer 1.6 <sup>16</sup>. These analyses suggested strong evidence in favor of the ln model (AICM = 1106); however, this method might be unreliable and less

accurate than more elaborate methods<sup>15,17-19</sup> that are computationally prohibitive for this dataset. Therefore, we present a comparison of results from both above-mentioned analyses, but for the remaining analyses used the ln model because there is at least some evidence for its better fit.

In all analyses, we used the CAT substitution model with a 4-category discrete gamma distribution to account for among-site rate variation<sup>20</sup>, and in most analyses we used the default uniform prior for the branching process. We also conducted one analysis (under the 1000 Ma root age prior, the ln clock model, and *Calibration set A*) using the birth-death prior instead, to check for influence of branching process prior choice. This analysis (see output files available at <https://doi.org/10.6084/m9.figshare.3472943>) suffered from serious convergence problems for certain parameters (although not the likelihood); however, preliminary results show age estimates only slightly different (mostly somewhat younger) than those obtained under the uniform prior for the crucial nodes, and the same general pattern (see Results). Therefore, we did not consider using the birth-death prior further.

To reduce computation time, we invoked the `-dc` option, i.e., constant (invariable) sites were ignored, resulting in an effective alignment of 20,790 sites. To check if exclusion of constant sites could have biased our results, we also replicated the analysis under *Calibration set A*, the 1000 Ma root age prior, and the ln clock model with constant sites included. This analysis took substantially longer to reach acceptable convergence for all parameters, but it supported the same overall pattern as the analysis excluding constant sites, with only negligible differences in age estimates (see output files available at <https://doi.org/10.6084/m9.figshare.3472943>). Thus, we are confident that excluding constant sites was also not an issue with the other analyses.

For each analysis, we ran two chains in parallel, sampling every 1000th cycle. Convergence was assessed with the *tracecomp* tool from the PhyloBayes package. We aimed at running the chains until the effective sample size (ESS) of all parameters was >100 and the maxdiff-values had dropped below 0.1, as recommended in the PhyloBayes manual. However, this goal was not achievable in reasonable time for all analyses, so we stopped some chains while some maxdiff-values were still between 0.2 and 0.3 and/or some ESS values between 50 and 100. Posterior estimates of divergence dates were extracted from the chain output using *readdiv* from the PhyloBayes package, using appropriate burn-in determined by plotting parameter values against number of samples. Output files from PhyloBayes, *tracecomp*, and *readdiv* are available in figshare (<https://doi.org/10.6084/m9.figshare.3472943>).

For interpretation of the chronograms we referred to the 2015 stratigraphic chart of the International Commission on Stratigraphy (ICS 2015); note that this chart differs from the still often used ICS 2014 with respect to the definition of the Tonian/Cryogenian boundary (ICS 2014: 850 Ma, ICS 2015: ~720 Ma) (see <http://www.stratigraphy.org/index.php/ics-chart-timescale>).

### **Description of the fossil calibration sets**

Note: Taxon names always refer to crown groups and numbers in brackets correspond to node numbers in Supplementary Fig. S3.

*Calibration set A.*—This set consists of 12 minimum and seven minimum-maximum constraints. For Bilateria, we largely adopted calibrations used by Rota-Stabelli et al.<sup>5</sup> (see that paper for justifications of the minimum and maximum bounds): 581-503 Ma for Ambulacraria (82), 581-519 Ma for Olfactores (Vertebrata + Tunicata; 78), 581-521 Ma for Arthropoda (71), 523-395 Ma for Pancrustacea (72), and 581-532 Ma for Lophotrochozoa (64). In addition, we constrained Annelida (66) at  $\geq 518$  Ma<sup>21</sup>, Hexapoda/Neoptera (73) at  $\geq 315$  Ma<sup>22</sup>, and Vertebrata (79) at  $\geq 461$  Ma<sup>23</sup>. Among Coelenterata, we assumed  $\geq 400$  Ma for Ctenophora (92)<sup>24</sup>,  $\geq 570$  Ma for Cnidaria (84)<sup>25</sup>,  $\geq 500$  Ma for Medusozoa (85)<sup>26</sup>,  $\geq 445$  Ma for Hydrozoa (86)<sup>26</sup>,  $\geq 540$  Ma for Anthozoa (89)<sup>27</sup>, and  $\geq 240$  Ma for Scleractinia (91)<sup>23</sup>. Poriferan calibrations included 542-190 Ma for Calcarea (101)<sup>28</sup>,  $\geq 521$  Ma for Homoscleromorpha + Calcarea (100)<sup>29</sup>, 542-405 Ma for Hexactinellida (99)<sup>30,31</sup>, and  $\geq 630$  Ma for Silicea *sensu stricto* (95)<sup>32</sup>. For Fungi (105), we used a conservative estimate of  $\geq 460$  Ma<sup>33</sup>. A more detailed explanation of the individual calibrations is given below.

1. Ambulacraria (82): 581-503 Ma. Adopted from Rota-Stabelli et al.<sup>5</sup>.
2. Olfactores (Vertebrata + Tunicata; 78): 581-519 Ma. Adopted from Rota-Stabelli et al.<sup>5</sup>.
3. Arthropoda (71): 581-521 Ma. Adopted from Rota-Stabelli et al.<sup>5</sup>.
4. Pancrustacea (72): 523-395 Ma. Adopted from Rota-Stabelli et al.<sup>5</sup>.
5. Lophotrochozoa (64): 581-532 Ma. Adopted from Rota-Stabelli et al.<sup>5</sup>.
6. Annelida (66):  $\geq 518$  Ma. Based on interpretation of *Phragmochaeta canicularis* from the lower Cambrian (lower to middle Atdabanian) Sirius Passet Lagerstätte (Peary Land, North Greenland) as the oldest known polychaete<sup>21</sup>. Minimum age corresponds to mean age of Cambrian Series 2, Stage 3 (521-514 Ma).

7. Hexapoda/Neoptera (73):  $\geq 315$  Ma. Based on the oldest known fossils of holometabolan and paraneopteran insects from the Middle Pennsylvanian (Carboniferous, Moscovian) of France<sup>22</sup>. The base of the Moscovian is dated as  $315.2 \pm 0.2$  Ma, hence we used a minimum age of 315 Ma for this node (note that insects branching earlier than crown-group Neoptera were not included by Philippe et al.<sup>1</sup>).
8. Vertebrata (79):  $\geq 461$  Ma. Based on the oldest known gnathostomes (acanthodians) from the mid-Ordovician ( $\sim 461$  Ma), as suggested in Hedges and Kumar<sup>23</sup>.
9. Ctenophora (92):  $\geq 400$  Ma. Based on interpretation of *Paleoctenophora brasseli* from the Lower Devonian Hunsrück Slate (West Germany) as the oldest known ctenophore with crown-group appearance<sup>24</sup>. The Hunsrück Slate is dated as 408-400 Ma (Late Pragian - Early Emsian), hence we used a minimum age of 400 Ma for crown-Ctenophora.
10. Cnidaria (84):  $\geq 570$  Ma. Based on interpretation of various microfossils from the Neoproterozoic Weng'an phosphorites (Doushantuo Formation, Southwest China) as crown-group cnidarians<sup>25</sup>. The Doushantuo Formation is dated as 570-580 Ma, hence we used a minimum age of 570 Ma for crown-group Cnidaria.
11. Medusozoa (85):  $\geq 500$  Ma. The oldest unambiguous crown-group medusozoans are known from the middle Cambrian (Series 3),  $\sim 500$  Ma<sup>26</sup>.
12. Hydrozoa (86):  $\geq 445$  Ma. The oldest unambiguous crown-group hydrozoans are known from the Upper Ordovician (Hirnantian),  $\sim 445$  Ma<sup>26</sup>.
13. Anthozoa (89):  $\geq 540$  Ma. Based on *Eolympia pediculata* from the lowest Cambrian ( $\sim 540$  Ma) Kuanchuanpu Formation (Southern China), which was interpreted as a sea anemone (subclass Hexacorallia) by Han et al.<sup>27</sup>.
14. Scleractinia (91):  $\geq 240$  Ma. Based on the appearance of scleractinian reef corals in the Middle Triassic,  $\sim 240$  Ma, as suggested in Hedges and Kumar<sup>23</sup>.
15. Calcarea (101): 542-190 Ma. The minimum constraint is based on *Leucandra walfordi* from the Early Jurassic ( $\sim 190$  Ma) of Northamptonshire (England), which is the oldest known fossil representative of modern calcareous sponges<sup>28</sup>. Although stem-group calcareans might well be older than Cambrian, a Precambrian origin of crown-group Calcarea appears unlikely, so based on similar arguments as applied to Hexactinellida<sup>30</sup>, we assigned a maximum constraint of 542 Ma (Ediacaran-Cambrian boundary) to this group.
16. Homoscleromorpha + Calcarea (100):  $\geq 521$  Ma. According to Xiao et al.<sup>29</sup> the earliest evidence of total-group Calcarea comes from Atdabanian-age strata (Cambrian Series 2, Stage 3), the base of which dates at  $\sim 521$  Ma. Under the Homoscleromorpha + Calcarea sister-group hypothesis<sup>1,34</sup>, the presence of total-group Calcarea implies the presence of total-group

Homoscleromorpha, which justifies this minimum constraint for crown-group

Homoscleromorpha + Calcarea.

17. Hexactinellida (99) (= Hexasterophora, since Amphidiscophora was not included by Philippe et al.<sup>1</sup>): 542-405 Ma. For justification of maximum constraint see Dohrmann et al.<sup>30</sup>. The minimum constraint follows from Nose et al.<sup>31</sup>, who reported the oldest representative of the order Hexactinosida, *Casearia devonica*, from the Lower Devonian of Northern Spain (Cantabrian Mountains). Although Hexactinosida is paraphyletic<sup>35</sup>, dictyonal frameworks like those of *C. devonica* clearly indicate the presence of crown-group Hexasterophora. The fossils were collected from lower-most Emsian strata; since the base of the Emsian is dated  $407.6 \pm 2.6$  Ma, we used a minimum age of 405 Ma for Hexasterophora.

18. Silicea *sensu stricto* (95) (= Hexactinellida + Demospongiae):  $\geq 630$  Ma. Based on the report of putative triaxonic spicules from the Neoproterozoic Doushantuo Formation (Yangtze Gorges area, South China), which were assigned an age of  $\sim 630$  Ma<sup>32</sup>. Triaxonic spicules are diagnostic for Hexactinellida; therefore, if the interpretation of Du and Wang<sup>32</sup> is correct, total-group hexactinellids, and therefore crown-group siliceous sponges, must have already existed at that time.

19. Fungi (105):  $\geq 460$  Ma. Based on interpretation of hyphae and spores from the Middle Ordovician of Wisconsin ( $\sim 460$  Ma) as arbuscular mycorrhizal fungi similar to modern Glomales<sup>33</sup>. To our knowledge the oldest evidence for crown-group Fungi.

*Calibration set B.*—This calibration set was derived from *Calibration set A* by removing five calibrations that might be considered uncertain or debatable, resulting in seven minimum and five minimum-maximum constraints. The calibrations removed were those for Cnidaria, Anthozoa, as well as all poriferan calibrations. For *Silicea sensu stricto* (= Demospongiae + Hexactinellida), we replaced the  $\geq 630$  Ma constraint with  $\geq 535$  Ma, following Antcliffe et al.<sup>36</sup>, who argued that hexactinellid sponge spicules of that age from Iran constitute the earliest unambiguous evidence for sponges in the fossil record (see also Muscente et al.<sup>37</sup>).

*Calibration set C.*—Because of differences in taxon sampling and tree topology, only six (three minimum, two maximum, one minimum-maximum) of the 24 calibrations used by Erwin et al.<sup>6</sup> could be adopted to the phylogeny of Philippe et al.<sup>1</sup>. These were  $\leq 713$  Ma for Demospongiae (96),  $\leq 565$  Ma for Ambulacraria (82),  $\geq 515$  Ma for Arthropoda (71),  $\geq 500$  Ma for Pancrustacea (72),  $\geq 325$  Ma for Hexapoda/Neoptera (73), and 548-530 Ma for the Bivalvia/Gastropoda split (69). Note that we performed the analysis with this calibration set

for comparative purposes only; the two maximum constraints used by Erwin et al. are problematic (e.g. Battistuzzi et al. <sup>38</sup>) and these results should therefore be interpreted with caution.

## SUPPLEMENTARY TABLES

**Supplementary Table S1.** Detailed age estimates (in million years ago [Ma]) and associated uncertainty for selected clades of chronogram shown in Fig. S1. *stderr*, standard error; *inf95*, lower bound of 95% Credibility Interval (CrI); *sup95*, upper bound of 95% CrI.

| <b>Clade (crown)</b>            | <b>mean</b> | <b>stderr</b> | <b>inf95</b> | <b>sup95</b> |
|---------------------------------|-------------|---------------|--------------|--------------|
| Opisthokonta                    | 1020.41     | 478.893       | 936.619      | 1130.28      |
| Choanozoa                       | 914.127     | 395.582       | 849.749      | 1012.54      |
| Metazoa                         | 850.192     | 353.248       | 787.373      | 937.992      |
| Non-Ctenophora Metazoa          | 839.659     | 344.735       | 777.642      | 924.856      |
| Placozoa + Cnidaria + Bilateria | 829.474     | 339.881       | 766.09       | 912.138      |
| Cnidaria + Bilateria            | 818.273     | 326.533       | 757.604      | 898.438      |
| Bilateria                       | 684.255     | 179.296       | 655.956      | 728.3        |
| Protostomia                     | 632.06      | 936.458       | 614.656      | 656.586      |
| Deuterostomia                   | 647.588     | 109.612       | 627.133      | 675.9        |
| Cnidaria                        | 783.168     | 275.057       | 731.491      | 847.316      |
| Medusozoa                       | 644.251     | 19.015        | 607.694      | 688.018      |
| Anthozoa                        | 717.023     | 219.487       | 679.503      | 771.423      |
| Porifera                        | 823.266     | 331.896       | 761.484      | 909.316      |
| Silicea s.s.                    | 788.452     | 308.818       | 733.523      | 868.161      |
| Demospongiae                    | 752.227     | 283.473       | 703.699      | 819.708      |
| Hexactinellida                  | 423.561     | 172.804       | 405.735      | 473.374      |
| Calcarea + Homoscleromorpha     | 800.577     | 321.948       | 739.26       | 882.635      |
| Calcarea                        | 511.767     | 27.703        | 432.862      | 541.594      |
| Ctenophora                      | 432.45      | 268.883       | 401.574      | 514.453      |

**Supplementary Table S2:** Detailed age estimates (Ma) and associated uncertainty for selected clades of chronogram shown in Fig. S2. *stderr*, standard error; *inf95*, lower bound of 95% CrI; *sup95*, upper bound of 95% CrI.

| <b>Clade (crown)</b>            | <b>mean</b> | <b>stderr</b> | <b>inf95</b> | <b>sup95</b> |
|---------------------------------|-------------|---------------|--------------|--------------|
| Opisthokonta                    | 1028.48     | 528.768       | 938.811      | 1150.43      |
| Choanozoa                       | 925.54      | 443.188       | 850.314      | 1033.67      |
| Metazoa                         | 855.059     | 388.512       | 789.729      | 944.879      |
| Epitheliozoa                    | 852.623     | 386.104       | 788.188      | 942.359      |
| Placozoa + Cnidaria + Bilateria | 844.578     | 382.103       | 780.361      | 932.353      |
| Cnidaria + Bilateria            | 834.577     | 367.338       | 772.834      | 920.658      |
| Bilateria                       | 689.25      | 200.105       | 656.55       | 738.787      |
| Protostomia                     | 633.865     | 104.286       | 615.577      | 658.34       |
| Deuterostomia                   | 648.878     | 125.952       | 626.96       | 676.328      |
| Cnidaria                        | 797.056     | 304.732       | 744.87       | 866.884      |
| Medusozoa                       | 651.596     | 205.476       | 614.172      | 696.927      |
| Anthozoa                        | 726.543     | 233.028       | 684.571      | 782.979      |
| Ctenophora                      | 413.576     | 127.546       | 400.437      | 449.249      |
| Porifera                        | 844.545     | 377.423       | 782.181      | 932.515      |
| Silicea s.s.                    | 810.28      | 346.076       | 752.002      | 889.725      |
| Demospongiae                    | 773.109     | 320.486       | 720.536      | 845.087      |
| Hexactinellida                  | 427.087     | 205.267       | 405.979      | 488.817      |
| Calcarea + Homoscleromorpha     | 823.316     | 360.951       | 765.03       | 905.252      |
| Calcarea                        | 516.772     | 274.752       | 441.466      | 541.344      |



**Supplementary Table S3:** Detailed age estimates (Ma) and associated uncertainty for the chronogram shown in Fig. 4. *stderr*, standard error; *inf95*, lower bound of 95% CrI; *sup95*, upper bound of 95% CrI. Node numbers refer to those given in Fig. S3.

| <b>Node</b> | <b>mean</b> | <b>stderr</b> | <b>inf95</b> | <b>sup95</b> |
|-------------|-------------|---------------|--------------|--------------|
| 55          | 1011.12     | 520.029       | 921.225      | 1133.64      |
| 56          | 994.339     | 492.888       | 908.527      | 1121.04      |
| 57          | 967.595     | 470.691       | 883.556      | 1088.4       |
| 58          | 906.14      | 389.121       | 836.357      | 993.024      |
| 59          | 814.483     | 318.725       | 757.698      | 885.34       |
| 60          | 804.635     | 313.364       | 747.156      | 873.861      |
| 61          | 793.404     | 304.666       | 738.366      | 859.852      |
| 62          | 691.422     | 201.028       | 658.661      | 740.049      |
| 63          | 636.468     | 105.494       | 618.583      | 662.357      |
| 64          | 578.82      | 191.483       | 574.262      | 580.932      |
| 65          | 565.827     | 415.988       | 556.952      | 574.276      |
| 66          | 522.334     | 313.756       | 518.152      | 529.975      |
| 67          | 397.234     | 138.261       | 362.952      | 418.649      |
| 68          | 528.462     | 126.187       | 493.341      | 546.094      |
| 69          | 489.98      | 211.101       | 435.64       | 514.944      |
| 70          | 553.125     | 593.647       | 543.054      | 568.397      |
| 71          | 525.497     | 382.047       | 521.082      | 535.921      |
| 72          | 437.503     | 984.562       | 418.229      | 459.094      |
| 73          | 330.162     | 952.168       | 316.293      | 352.709      |
| 74          | 498.913     | 761.357       | 484.951      | 514.695      |
| 75          | 467.683     | 104.509       | 447.332      | 488.168      |
| 76          | 651.025     | 124.791       | 629.924      | 683.949      |
| 77          | 607.404     | 726.796       | 590.805      | 620.494      |
| 78          | 575.763     | 469.284       | 563.426      | 580.876      |
| 79          | 467.986     | 639.054       | 461.336      | 485.921      |
| 80          | 386.061     | 161.821       | 350.892      | 418.487      |
| 81          | 602.76      | 140.081       | 571.64       | 627.536      |
| 82          | 555.032     | 184.712       | 511.071      | 579.718      |
| 83          | 783.699     | 293.529       | 730.937      | 849.112      |
| 84          | 772.305     | 279.946       | 721.057      | 833.529      |
| 85          | 653.764     | 194.859       | 619.309      | 700.584      |

|     |         |         |         |         |
|-----|---------|---------|---------|---------|
| 86  | 454.574 | 884.534 | 445.196 | 482.574 |
| 87  | 424.114 | 108.664 | 405.166 | 450.562 |
| 88  | 262.135 | 28.101  | 190.129 | 303.195 |
| 89  | 718.859 | 220.658 | 679.919 | 770.219 |
| 90  | 577.729 | 458.849 | 475.364 | 654.642 |
| 91  | 599.659 | 449.372 | 496.841 | 677.36  |
| 92  | 414.518 | 126.494 | 400.449 | 450.316 |
| 93  | 380.588 | 177.749 | 347.626 | 423.721 |
| 94  | 798.208 | 304.385 | 743.245 | 864.822 |
| 95  | 764.712 | 279.401 | 715.355 | 826.308 |
| 96  | 730.883 | 260.342 | 681.668 | 789.532 |
| 97  | 645.615 | 258.238 | 595.502 | 698.616 |
| 98  | 625.492 | 273.064 | 569.49  | 679.097 |
| 99  | 423.633 | 166.174 | 405.369 | 464.983 |
| 100 | 776.331 | 300.988 | 719.894 | 842.821 |
| 101 | 505.107 | 317.461 | 434.251 | 539.995 |
| 102 | 786.62  | 362.583 | 716.66  | 863.299 |
| 103 | 501.073 | 460.679 | 398.683 | 580.287 |
| 104 | 735.537 | 62.488  | 607.989 | 861.422 |
| 105 | 603.58  | 816.637 | 475.644 | 779.783 |
| 106 | 574.575 | 823.585 | 442.703 | 747.969 |
| 107 | 287.381 | 648.847 | 130.624 | 409.806 |
| 108 | 472.016 | 846.272 | 332.673 | 648.935 |

SUPPLEMENTARY FIGURES

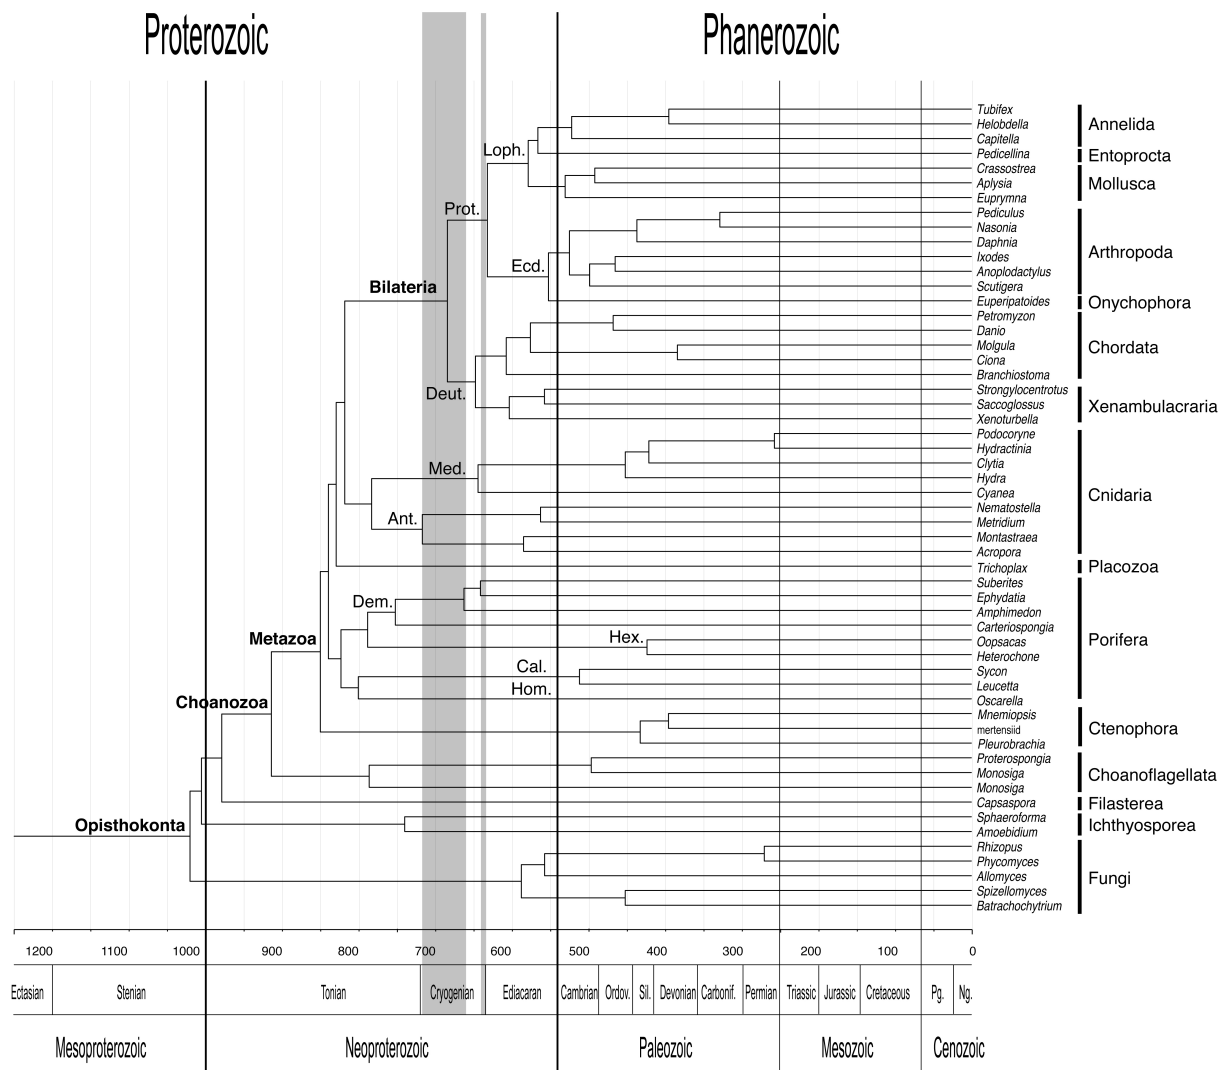

**Supplementary Figure S1: Chronogram obtained as in Fig. 4, but with tree topology modified to display Ctenophora as sister to the remaining Metazoa<sup>3</sup>. Gray areas indicate Sturtian (left) and Marinoan (right) glaciations<sup>39</sup>. Ages in million years before present (Ma). Stratigraphic abbreviations: Ordov., Ordovician; Sil., Silurian; Carbonif., Carboniferous; Pg., Paleogene; Ng., Neogene. Taxon abbreviations: Hom., Homoscleromorpha; Cal., Calcarea; Hex., Hexactinellida; Dem., Demospongiae; Ant., Anthozoa; Med., Medusozoa; Deut., Deuterostomia; Prot., Protostomia; Ecd., Ecdysozoa; Loph., Lophotrochozoa.**

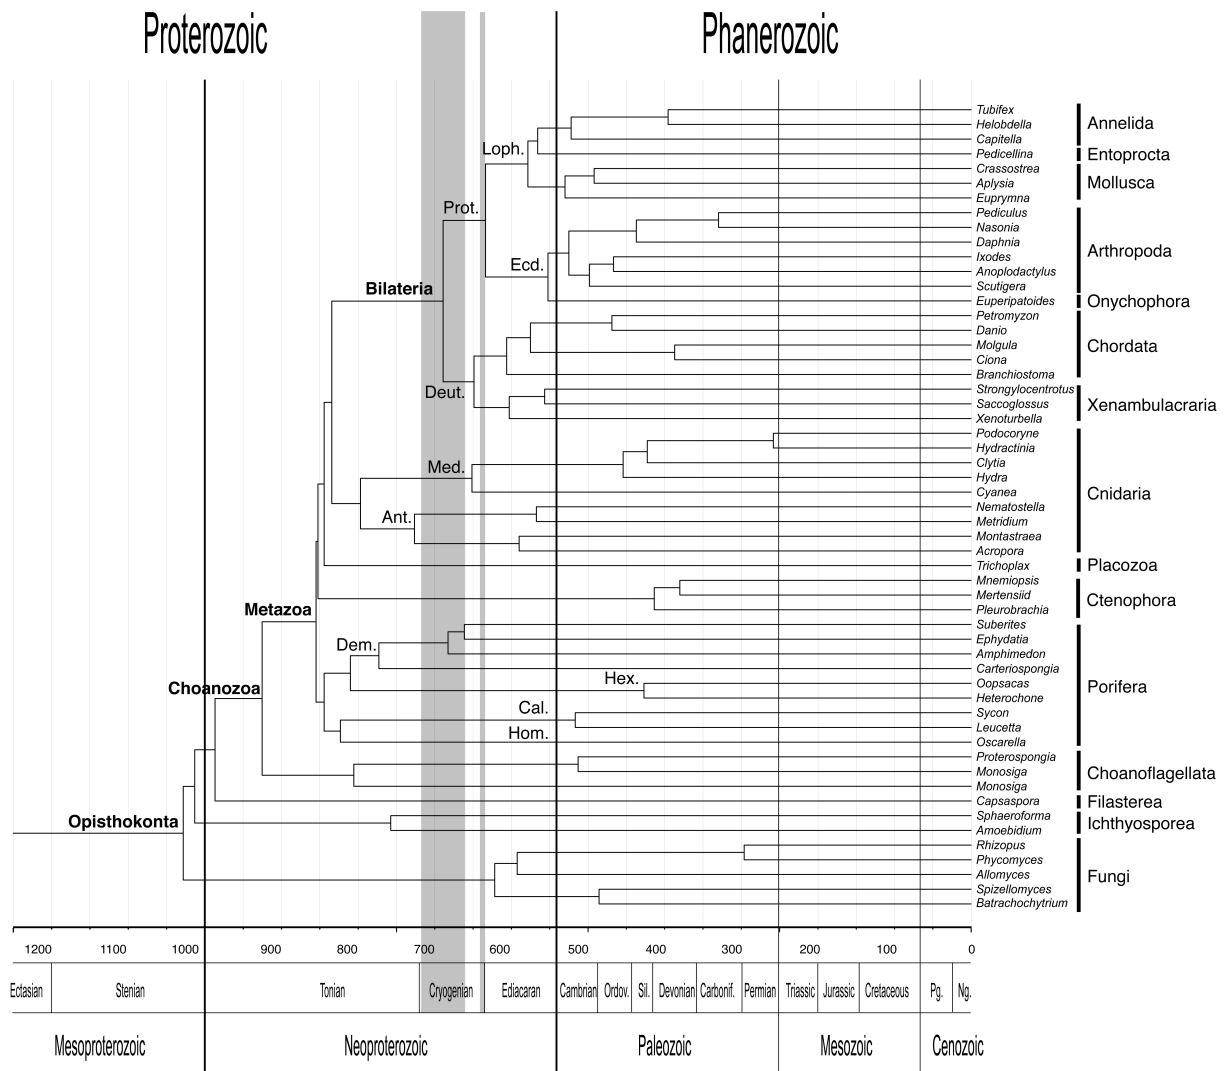

**Supplementary Figure S2: Chronogram obtained as in Fig. 4, but with tree topology modified to display Ctenophora as sister to Placozoa + Cnidaria + Bilateria<sup>2</sup>. Gray areas indicate Sturtian (left) and Marinoan (right) glaciations<sup>39</sup>. Ages in million years before present (Ma). Stratigraphic abbreviations: Ordov., Ordovician; Sil., Silurian; Carbonif., Carboniferous; Pg., Paleogene; Ng., Neogene. Taxon abbreviations: Hom., Homoscleromorpha; Cal., Calcarea; Hex., Hexactinellida; Dem., Demospongiae; Ant., Anthozoa; Med., Medusozoa; Deut., Deuterostomia; Prot., Protostomia; Ecd., Ecdysozoa; Loph., Lophotrochozoa.**

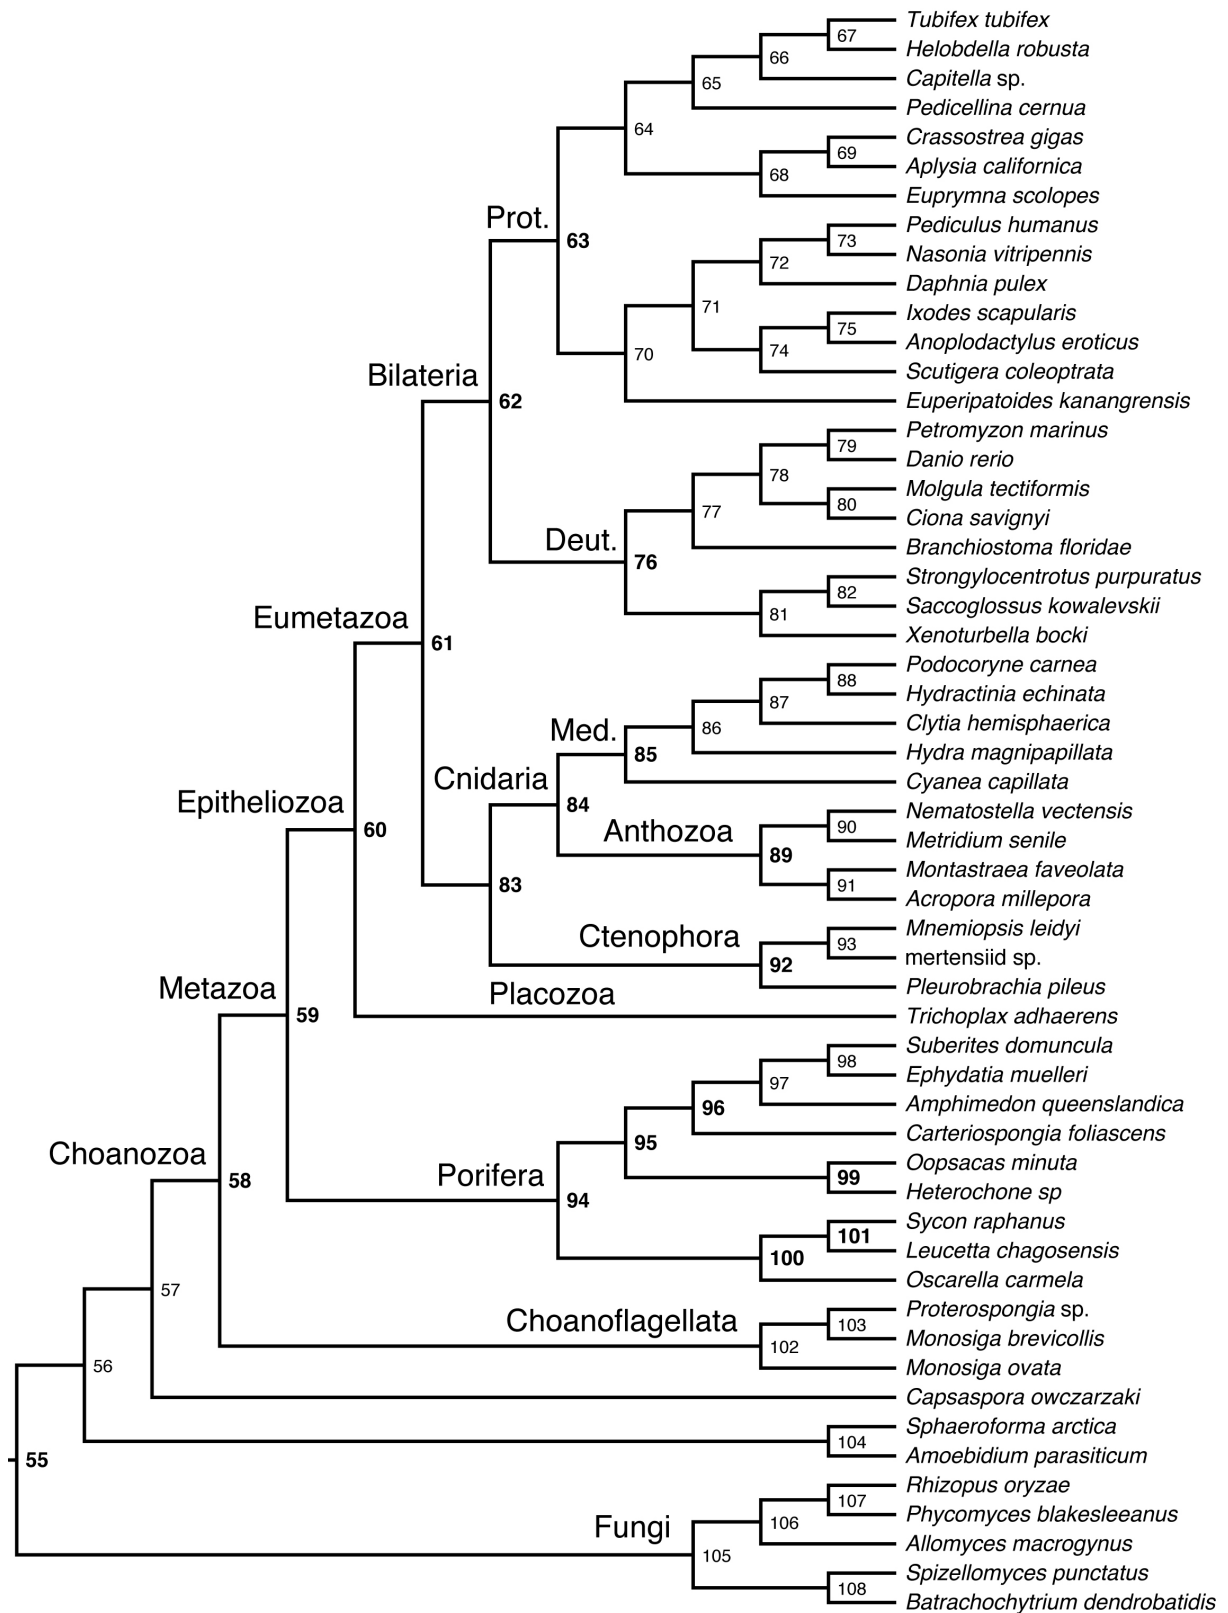

**Supplementary Figure S3: Phylogeny of crown-Opisthokonta obtained by Philippe et al.**

<sup>1</sup>, with node numbers referred to in text indicated. Numbers of select nodes shown in Figs. 1-3 displayed in bold. Deut., Deuterostomia; Prot., Protostomia.

## SUPPLEMENTARY REFERENCES

1. Philippe, H. et al. Phylogenomics revives traditional views on deep animal relationships. *Curr. Biol.* **19**, 706-712 (2009).
2. Pisani, D. et al. Genomic data do not support comb jellies as the sister group to all other animals. *Proc. Natl. Acad. Sci. USA* **112**, 15402-15407 (2015).
3. Borowiec, M. L., Lee, E. K., Chiu, J. C. & Plachetzki, D. C. Extracting phylogenetic signal and accounting for bias in whole-genome data sets supports the Ctenophora as sister to remaining Metazoa. *BMC Genomics* **16**, 987 (2015).
4. Rambaut, A. & Charleston, M. TreeEdit. Available at <http://evolve.zoo.ox.ac.uk/software/TreeEdit/main.html> (2002).
5. Rota-Stabelli, O., Daley, A. C. & Pisani, D. Molecular timetrees reveal a Cambrian colonization of land and a new scenario for ecdysozoan evolution. *Curr. Biol.* **23**, 392-398 (2013).
6. Erwin, D. H. et al. The Cambrian conundrum: early divergence and later ecological success in the early history of animals. *Science* **334**, 1091-1097 (2011).
7. Cavalier-Smith, T. Deep phylogeny, ancestral groups and the four ages of life. *Phil. Trans. R. Soc. B* **365**, 111-132 (2010).
8. Parfrey, L. W., Lahr, D. J. G., Knoll, A. H. & Katz, L. A. Estimating the timing of early eukaryotic diversification with multigene molecular clocks. *Proc. Natl. Acad. Sci. USA* **108**, 13624-13629 (2011).
9. Lartillot, N., Lepage, T. & Blanquart, S. PhyloBayes 3: a Bayesian software package for phylogenetic reconstruction and molecular dating. *Bioinformatics* **25**, 2286-2288 (2009).
10. Lartillot, N. & Philippe, H. A Bayesian mixture model for across-site heterogeneities in the amino-acid replacement process. *Mol. Biol. Evol.* **21**, 1095-1109 (2004).
11. Lepage, T., Bryant, D., Philippe, H. & Lartillot, N. A general comparison of relaxed molecular clock models. *Mol. Biol. Evol.* **24**, 2669-2680 (2007).
12. Ho, S. Y. W. An examination of phylogenetic models of substitution rate variation among lineages. *Biol. Lett.* **5**, 421-424 (2009).
13. Linder, M., Britton, T. & Sennblad, B. Evaluation of Bayesian models of substitution rate evolution—parental guidance versus mutual independence. *Syst. Biol.* **60**, 329-342 (2011).
14. Raftery, A., Newton, M., Satagopan, J. & Krivitsky, P. in *Bayesian Statistics* (eds Bernardo, J. M., Bayarri, M. J. & Berger, J. O.) 1-45 (Oxford University Press, Oxford, 2007).
15. Baele, G. et al. Improving the accuracy of demographic and molecular clock model comparison while accommodating phylogenetic uncertainty. *Mol. Biol. Evol.* **29**, 2157-2167 (2012).
16. Rambaut, A., Suchard, M. & Drummond, A. J. Tracer v1.6. Available from <http://tree.bio.ed.ac.uk/software/tracer/> (2013).
17. Lartillot, N. & Philippe, H. Computing Bayes factors using thermodynamic integration. *Syst. Biol.* **55**, 195-207 (2006).
18. Xie, W., Lewis, P. O., Fan, Y., Kuo, L. & Chen, M.-H. Improving marginal likelihood estimation for Bayesian phylogenetic model selection. *Syst. Biol.* **60**, 150-160 (2011).
19. Baele, G., Li, W. L. S., Drummond, A. J., Suchard, M. A. & Lemey, P. Accurate model selection of relaxed molecular clocks in Bayesian phylogenetics. *Mol. Biol. Evol.* **30**, 239-243 (2013).
20. Yang, Z. Maximum likelihood phylogenetic estimation from DNA sequences with variable rates over sites: approximate methods. *J. Mol. Evol.* **39**, 306-314 (1994).

21. Conway Morris, S. & Peel, J. S. The earliest annelids: Lower Cambrian polychaetes from the Sirius Passet Lagerstätte, Peary Land, North Greenland. *Acta Palaeontol. Pol.* **53**, 137-148 (2008).
22. Nel, A. et al. The earliest known holometabolous insects. *Nature* **503**, 257-261 (2013).
23. Hedges, S. B. & Kumar, S. *The Timetree of Life* (Oxford University Press, Oxford, 2009).
24. Stanley Jr., G. D. & Stürmer, W. The first fossil ctenophore from the Lower Devonian of West Germany. *Nature* **303**, 518-520 (1983).
25. Chen, J.-Y. et al. Precambrian animal life: probable developmental and adult cnidarian forms from Southwest China. *Dev. Biol.* **248**, 182-196 (2002).
26. Young, G. A. & Hagadorn, J. W. The fossil record of cnidarian medusae. *Palaeoworld* **19**, 212-221 (2010).
27. Han, J. et al. Tiny sea anemone from the lower Cambrian of China. *PLoS One* **5**, e13276 (2010).
28. Pickett, J. in *Systema Porifera. A Guide to the Classification of sponges* (eds Hooper, J. N. A. & van Soest, R. W. M.) 1117-1119 (Plenum, New York, 2002).
29. Xiao, S., Hu, J., Yuan, X., Parsley, R. L. & Cao, R. Articulated sponges from the Lower Cambrian Hetang Formation in southern Anhui, South China: their age and implications for the early evolution of sponges. *Palaeogeogr. Palaeocl. Palaeoecol.* **220**, 89-117 (2005).
30. Dohrmann, M., Vargas, S., Janussen, D., Collins, A. G. & Wörheide, G. Molecular paleobiology of early-branching animals: integrating DNA and fossils elucidates the evolutionary history of hexactinellid sponges. *Paleobiology* **39**, 95-108 (2013).
31. Nose, M., Vodrazka, R., Fernández, L.-P. & Méndez-Bedia, I. First record of chambered hexactinellid sponges from the Palaeozoic. *Acta Palaeontol. Pol.* **59**, 985-996 (2014).
32. Du, W. & Wang, X. L. Hexactinellid sponge spicules in Neoproterozoic dolostone from South China. *Paleont. Res.* **16**, 199-207 (2012).
33. Redecker, D., Kodner, R. & Graham, L. E. Glomalean fungi from the Ordovician. *Science* **289**, 1920-1921 (2000).
34. Dohrmann, M., Janussen, D., Reitner, J., Collins, A. G. & Wörheide, G. Phylogeny and evolution of glass sponges (Porifera, Hexactinellida). *Syst. Biol.* **57**, 388-405 (2008).
35. Dohrmann, M. et al. An integrative systematic framework helps to reconstruct skeletal evolution of glass sponges (Porifera, Hexactinellida). *Frontiers Zool.* **14**, 18 (2017).
36. Antcliff, J. B., Callow, R. H. T. & Brasier, M. D. Giving the early fossil record of sponges a squeeze. *Biol. Rev.* **89**, 972-1004 (2014).
37. Muscente, A. D., Michel, F. M., Dale, J. G. & Xiao, S. Assessing the veracity of Precambrian 'sponge' fossils using *in situ* nanoscale analytical techniques. *Precamb. Res.* **263**, 142-156 (2015).
38. Battistuzzi, F. U., Billing-Ross, P., Murillo, O., Filipinski, A. & Kumar, S. A protocol for diagnosing the effect of calibration priors on posterior time estimates: A case study for the Cambrian explosion of animal phyla. *Mol. Biol. Evol.* **32**, 1907-1912 (2015).
39. Rooney, A. D., Strauss, J. V., Brandon, A. D. & Macdonald, F. A. A Cryogenian chronology: Two long-lasting synchronous Neoproterozoic glaciations. *Geology* **43**, 459-462 (2015).
